# Supplementary material for: Fe3C-based oxygen reduction catalysts: synthesis, hollow spherical structures and applications in fuel cells
Source: Royal Society of Chemistry journal article supplement (doi:10.1039/c4ta03986f), 2014-11-21
Supplement: c4ta03986f1.pdf [file c4ta03986f1.pdf]

## Supporting Information

**Title:** Fe<sub>3</sub>C-based Oxygen Reduction Catalysts: Synthesis, Hollow Spherical Structures and Applications in Fuel Cells

**Author(s):** Yang Hu, Jens Oluf Jensen, Wei Zhang, Santiago Martin, Régis Chenitz, Chao Pan, Wei Xing,\* Niels J. Bjerrum and Qingfeng Li\*

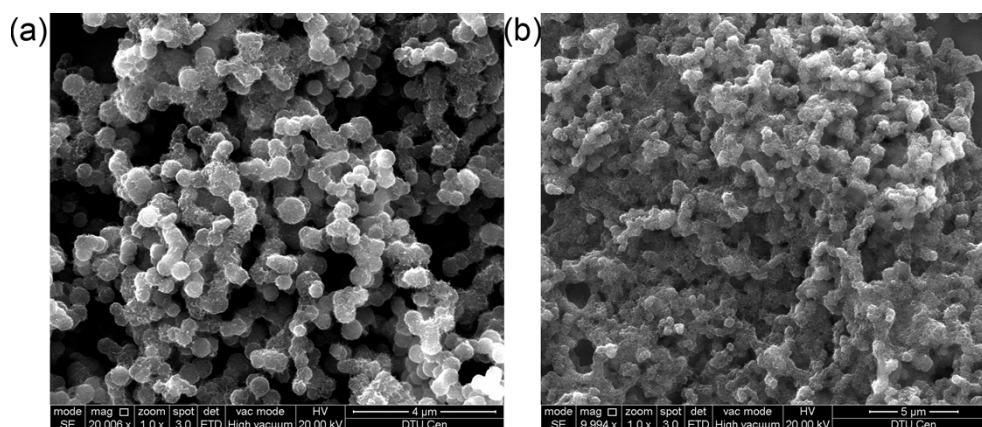

**Fig. S1** SEM images of (a) Fe/C-630 and (b) Fe<sub>3</sub>C/C-660.

| Sample   | Mean diameter |
|----------|---------------|
| Fe/C-500 | 412 nm        |
| Fe/C-600 | 408 nm        |
| Fe/C-630 | 448 nm        |
| Fe/C-660 | 436 nm        |
| Fe/C-700 | 445 nm        |
| Fe/C-800 | 530 nm        |

**Table S1** Mean diameters of the spheres of prepared catalysts.

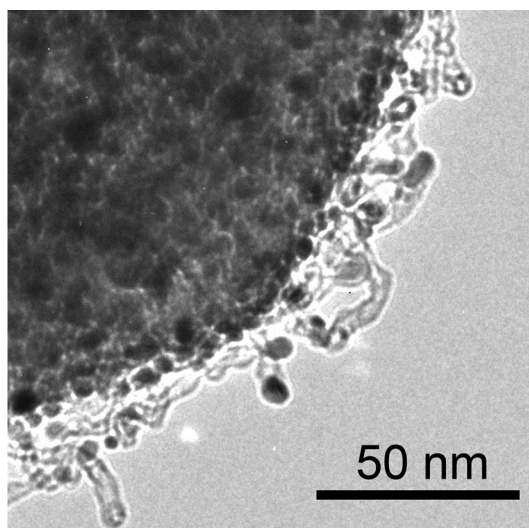

**Fig. S2a** CNT structures on the surface of a Fe/C-700 catalyst sphere.

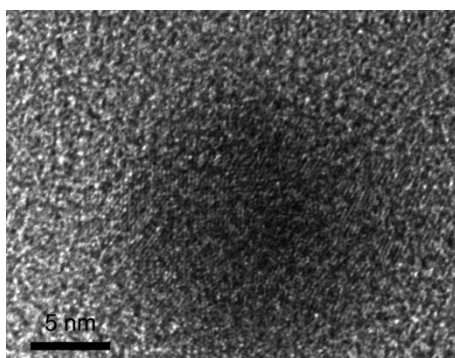

**Fig. S2b** HRTEM image of a  $\text{Fe}_3\text{C}$  nanoparticle in Fe/C-600

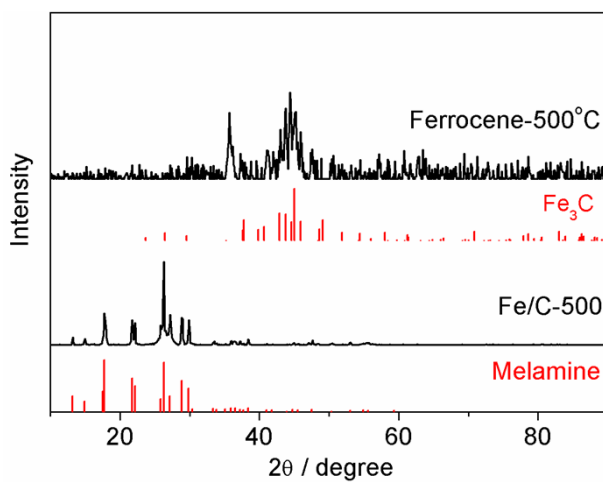

**Fig. S3** XRD patterns of Fe/C-500 and the product obtained by using ferrocene as the precursor pyrolyzed at 500°C.

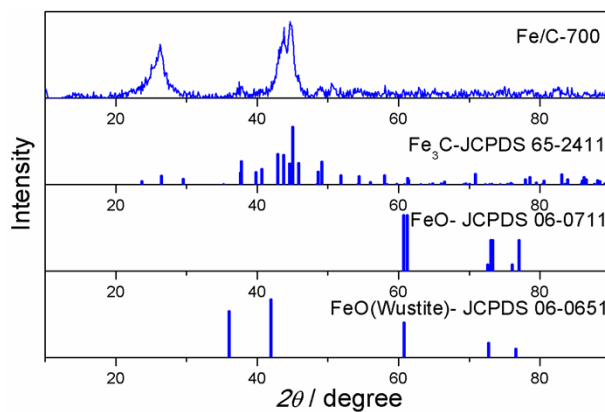

**Fig. S4** XRD patterns of Fe/C-700 and the standard XRD patterns assigned for Fe<sub>3</sub>C and two types of iron oxide.

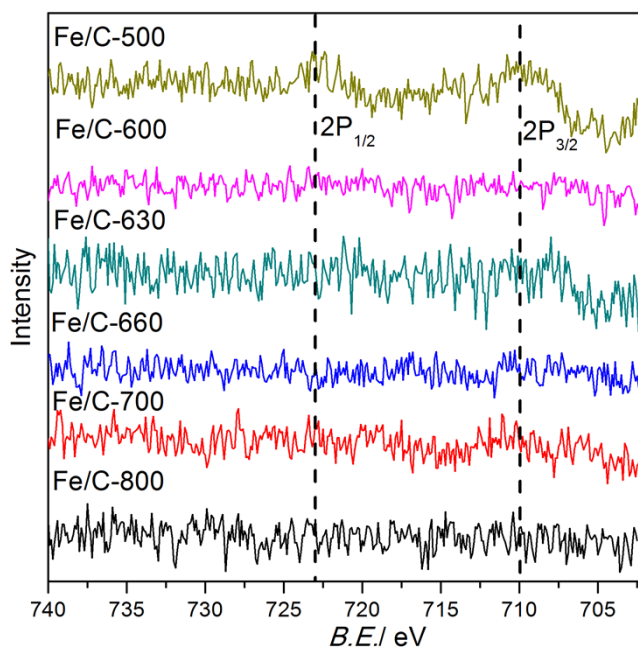

**Fig. S5** High resolution XPS spectra of Fe-2p for Fe/C-500, Fe/C-600, Fe/C-630, Fe/C-660, Fe/C-700 and Fe/C-800.

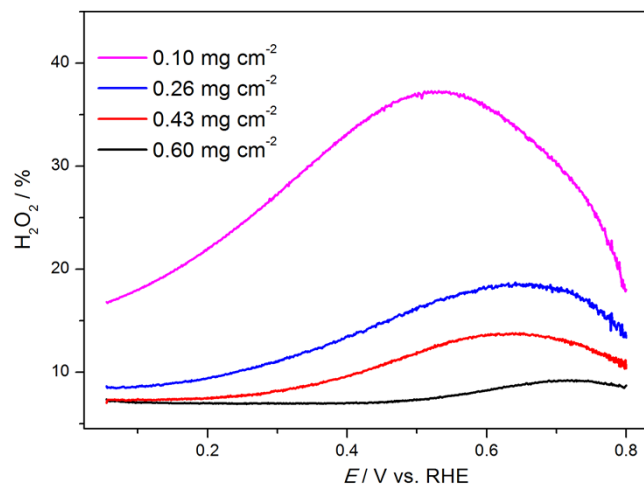

**Fig. S6** Peroxide yields of Fe/C-700 (at different loadings) for ORR in 0.1M  $\text{HClO}_4$ .

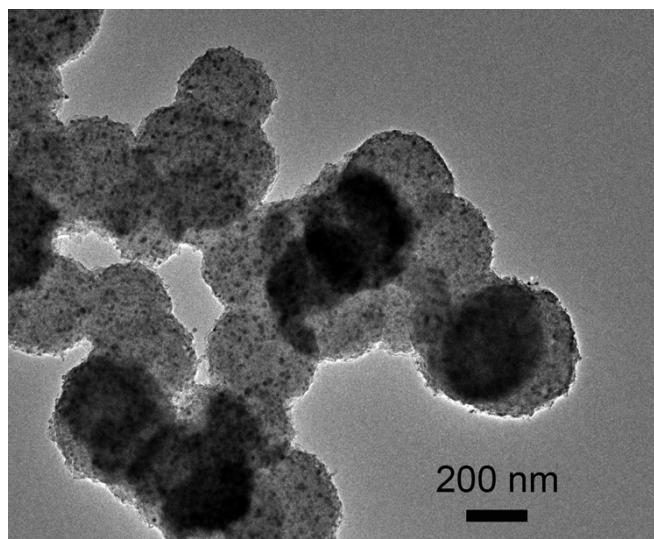

**Fig. S7** Catalyst spheres of Fe/C-800 after the AST test in  $\text{O}_2$ .

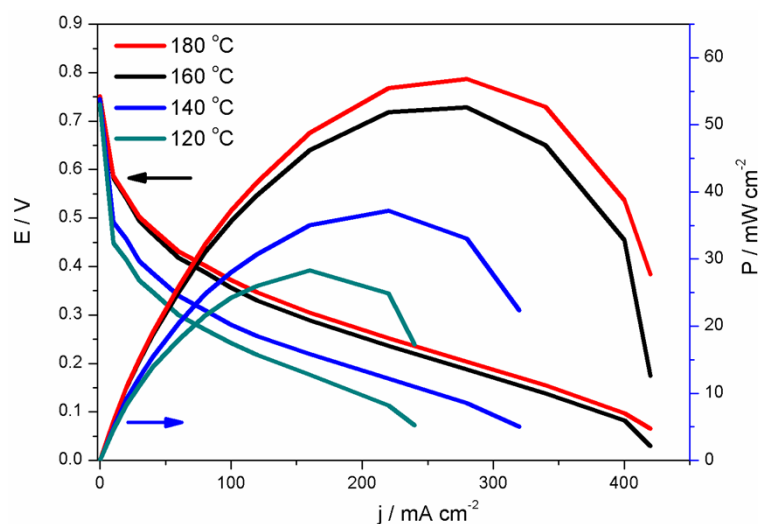

**Fig. S8** Polarization and power density curves of the PBI-2 H<sub>2</sub>-O<sub>2</sub> fuel cell different working temperatures under ambient pressure. The catalyst loading is 3.95 mg cm<sup>-2</sup>. See Experimental Section for other operation conditions.

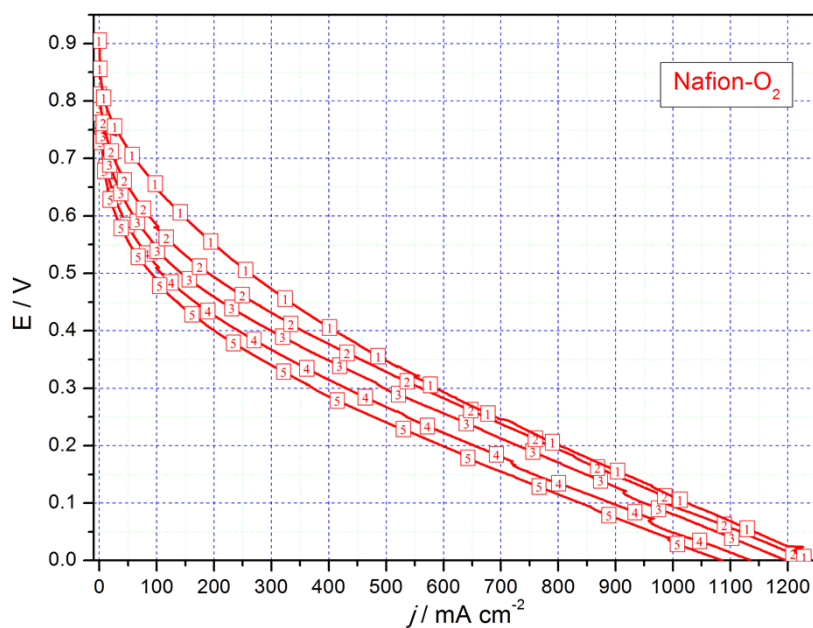

**Fig. S9** Polarization curves obtained throughout stability test of Nafion-O<sub>2</sub> (shown in Figure 9) at various times, i.e. 0 h (1), 2.0 h (2), 7.7 h (3), 26.4 h (4), and 50.0 h (5). The catalyst loading in the cathode is 3.95 mg cm<sup>-2</sup>. The fuel cell temperature is 80 °C. See Experimental Section for other operation conditions.

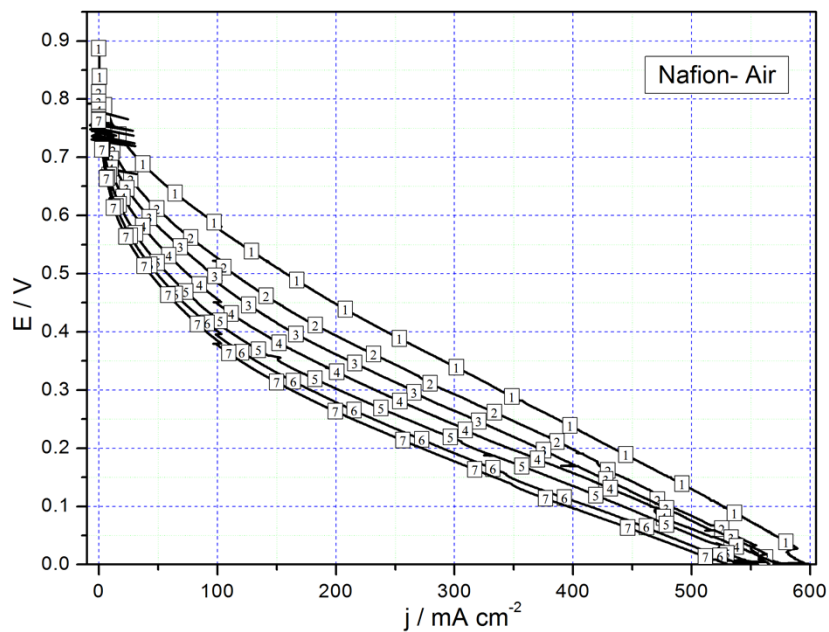

**Fig. S10** Polarization curves obtained throughout stability test of Nafion- Air (shown in Figure 9) at various times, i.e. 0 h(1), 2.0 h (2), 7.7 h (3), 26.4 h (4), 50.0 h (5), 75.6 h (6) and 100.0 h (7). The catalyst loading in the cathode is  $4.08 \text{ mg cm}^{-2}$ . The fuel cell temperature is  $80 \text{ }^\circ\text{C}$ . See Experimental Section for other operation conditions.
